# Supplementary material for: Antimicrobial Usage and Antimicrobial Resistance in Animal Production in Southeast Asia: A Review
Source: MDPI journal article supplement (doi:10.3390/antibiotics5040037), 2016-11-02
Supplement: s1 [file s1]

# Antimicrobial Usage and Antimicrobial Resistance in Animal Production in Southeast Asia: A Review

Nguyen T. Nhung, Nguyen V. Cuong, Guy Thwaites and Juan Carrique-Mas

**Table S1.** Publications reporting on AMU in terrestrial and aquatic animal farming in SEA.

| Ref.    | Production Species | Year of Study | No. Farms | Country and Region                     | No. of Classes (and Antimicrobials Used) (Period of usage) | Type of Data             | Classes (and Antimicrobials) Used                                                                                                                                                                                                                                                                                                                                                                                                                                                     |
|---------|--------------------|---------------|-----------|----------------------------------------|------------------------------------------------------------|--------------------------|---------------------------------------------------------------------------------------------------------------------------------------------------------------------------------------------------------------------------------------------------------------------------------------------------------------------------------------------------------------------------------------------------------------------------------------------------------------------------------------|
| [21]    | Chickens           | NR            | 8         | Central region, Thailand, central area | 15 (8) (2 months)                                          | Qualitative              | <b>Aminoglycosides</b> (CN, NEO), <b>penicillins</b> (AMP, AMX), <b>quinolones</b> (ENR, NOR), <b>macrolides</b> (ERY, TY, ROX), <b>phenicols</b> (C), <b>tetracyclines</b> (TE, CTC, DOX), <b>sulphonamides</b> (SPD), <b>diaminopyrimidine</b> (TMP)                                                                                                                                                                                                                                |
| [20]    | Chickens           | 2009/10       | 210       | Red River Delta, Vietnam               | 12 (28) (Period not specified)                             | Qualitative              | <b>Aminoglycosides</b> (STM, NEO, CN, KA), <b>penicillins</b> (PEN, AMP, AMX), <b>1st generation cephalosporins</b> (CFL), <b>quinolones</b> (ENR, NOR), <b>macrolides</b> (ERY, JSM, SRM, TY), <b>lincosamides</b> (LCM), <b>phenicols</b> (C, THI), <b>sulphonamides</b> (SMX, SUD, SQ, SCP, SUG), <b>tetracyclines</b> (DOX, OTC, CTC), <b>pleuromutilins</b> (TIA), <b>diaminopyrimidines</b> (TMP), <b>polymixins</b> (CT)                                                       |
|         | Pigs               |               |           |                                        | 13 (31) (Period not specified)                             | Qualitative              | <b>Aminoglycosides</b> (STM, NEO, CN, KA), <b>penicillins</b> (PEN, AMP, AMX), <b>1st generation cephalosporins</b> (CFD), <b>3rd generation cephalosporins</b> (CTX), <b>quinolones</b> (ENR, NOR, DAN, FLU), <b>macrolides</b> (ERY, KSM, SRM, TY), <b>pleuromutilins</b> (TIA), <b>phenicols</b> (FFC, C, THI), <b>sulphonamides</b> (SMX, SCP, SUG), <b>tetracyclines</b> (TE, OTC, CTC, DOX), <b>lincosamides</b> (LCM), <b>diaminopyrimidines</b> (TMP), <b>polymixins</b> (CT) |
| [16,23] | Chickens           | 2012/13       | 208       | Mekong Delta, Vietnam                  | 11 (28) (~3 months)                                        | Qualitative/quantitative | <b>Aminoglycosides</b> (STM, NEO, CN, APR, S), <b>penicillins</b> (AMP, AMX), <b>quinolones</b> (FLU, OA, NOR, ENR), <b>macrolides</b> (TY, TIL, ERY, SRM), <b>phenicols</b> (FFC, THI), <b>sulphonamides</b> (SMX, SUD, SDT, SDM), <b>diaminopyrimidine</b> (TMP), <b>tetracyclines</b> (TE, CTC, DOX), <b>polymixins</b> (CT), <b>lincosamides</b> (LCM), <b>pleuromutilins</b> (TIA)                                                                                               |

Table S1. Cont.

| Ref. | Production Species                | Year of Study | No. Farms | Country and Region                          | No. of Classes (and Antimicrobials Used) (Period of usage) | Type of Data             | Classes (and Antimicrobials) Used                                                                                                                                                                                                                                                                             |
|------|-----------------------------------|---------------|-----------|---------------------------------------------|------------------------------------------------------------|--------------------------|---------------------------------------------------------------------------------------------------------------------------------------------------------------------------------------------------------------------------------------------------------------------------------------------------------------|
| [18] | Chickens                          |               | 6         | Mekong Delta, Vietnam                       | 8 (10) (4 months)                                          | Qualitative/quantitative | <b>Aminoglycosides (CN), penicillins (AMX), 1st generation cephalosporins (CFL), macrolides (TY, TIL), phenicols (FFC), quinolones (ENR, NOR), polymixins (CT), tetracyclines (DOX)</b>                                                                                                                       |
|      | Pigs                              |               | 4         |                                             | 8 (14) (6 months]                                          | Qualitative/quantitative | <b>Aminoglycosides (NEO, CN, KA), penicillins (AMX, AMP), 3rd generation cephalosporins (CEF), macrolides (TY, SRM), phenicols (C, FFC), quinolones (ENR, NOR), polymixins (CT), tetracyclines (DOX)</b>                                                                                                      |
| [22] | Catfish                           | 2011/12       | 32        | Mekong Delta, Vietnam                       | 11 (17) (Period not specified)                             | Qualitative              | <b>Aminoglycosides (APR, KA), penicillins (AMP, AMX), 1st generation cephalosporins (CFL), quinolones (CIP, ENR), polymixin (CT), phenicols (FFC), diaminopyrimidine (OMT, TMP), tetracyclines (OTC, DOX), rifamycins (RIF), sulphonamides (SDT, SMX)</b>                                                     |
|      | Shrimp                            | 2011/12       | 34        |                                             | 1                                                          | Qualitative              | <b>Tetracyclines (OTC)</b>                                                                                                                                                                                                                                                                                    |
|      | Tilapia                           | 2011/12       | 31        | Several locations, (Thailand)               | 2 (2)                                                      | Qualitative              | <b>Penicillins (AMX), tetracyclines (OTC)</b>                                                                                                                                                                                                                                                                 |
|      | Shrimp                            | 2011          | 34        |                                             | 2 (2)                                                      | Qualitative              | <b>Penicillins (AMX), quinolones (NOR)</b>                                                                                                                                                                                                                                                                    |
| [17] | Fish and shrimp (several species) | 2011          | 94        | Red River Delta and Mekong Delta, (Vietnam) | 11 (24)                                                    | Qualitative              | <b>Penicillins (PEN, AMP, AMX), 1st generation cephalosporins (CFL), aminoglycosides (NEO, KA), diaminopyrimidine (TMP), macrolides (ERY), phenicols (FFC, THI), tetracyclines (TE, OTC, CTC, DOX), polymixins (CT), quinolones (ENR, NOR, OF, CIP, FLU), sulphonamides (SMX, SUD, SPD), rifamycins (RIF)</b> |

NR = Not reported; AMP = ampicillin, AMX = amoxicillin, APR = apramycin, C = chloramphenicol, CEF = ceftiofur, CFD = cefradine, CFL = cefalexin, CIP = ciprofloxacin, CN = gentamicin, CT = colistin, CTC = chlortetracycline, CTX = cefotaxime, DAN = danofloxacin, DOX = doxycycline, ENR = enrofloxacin, ERY = erythromycin, FFC = florfenicol, FLU = flumequin, JSM = josamycin, KA = kanamycin, KSM = kitasamycin, LCM = lincomycin, NEO = neomycin, NOR = norfloxacin, OA = oxolinic acid, OF = ofloxacin, OMT = ormethoprim, OTC = oxytetracycline, PEN = penicillin, RIF = rifampicin, ROX = roxithromycin, S = streptomycin, SCP = sulphachlorpyrazin, SDT = sulphadimethoxine, SDM = sulphadimerazine, SQ = sulphaquinoxaline, SPD = sulphadiazine, SRM = spiramycin, STM = spectinomycin, SUD = sulphadimidine, SUG = sulphaguanidine, SMX = sulfamethoxazole, TE = tetracycline, TIA = tiamulin, TIL = tilmicosin, THI = thiamphenicol, TMP = trimethoprim, TY = tylosin.

**Table S5.** Phenotypic AMR in organisms other than *E. coli*, NTS and *Campylobacter* spp. in terrestrial animals.

| Ref. | Country   | Organism                 | Host    | Source   | Method of Testing       | No. Isolates | Prevalence of AMR                                                                                                                                          |
|------|-----------|--------------------------|---------|----------|-------------------------|--------------|------------------------------------------------------------------------------------------------------------------------------------------------------------|
| [57] | Indonesia | <i>Enterococcus</i> spp. | Chicken | Farm     | Agar dilution           | 116          | AMP (0%), C (4.3%), CN (3.5%), ENR (44.0%), ERY (64.7%), KA (49.2%), LCM (74.2%), OTC (73.3%), S (35.4%), VAN (0%)                                         |
| [57] | Thailand  | <i>Enterococcus</i> spp. | Chicken | Farm     | Agar dilution           | 70           | AMP (0%), C (11.4%), CN (1.4%), ENR (48.6%), ERY (71.4%), %, KA (52.8%), LCM (74.3%), OTC (75.8%), S (28.6%), VAN (0%)                                     |
| [57] | Vietnam   | <i>Enterococcus</i> spp. | Chicken | Abattoir | Agar dilution           | 111          | AMP (15.3%), C (25.2%), CN (29.8%), ENR (76.65%), ERY (90.9%), KA (55.9%), LCM (89.2%), OTC (98.2%), S (68.5%), VAN (0%)                                   |
| [40] | Thailand  | <i>Enterococcus</i> spp. | Pig     | Farm     | Disk diffusion          | 29           | C (2.0%), CIP (2%), CLI (90.0%), ERY (80.0%), KA (48.0%), PEN (20.0%), TE (80.0%), S (82.0%), SMX (72.0%)                                                  |
| [84] | Malaysia  | VRE                      | Chicken | Farm     |                         | 140          | No other antimicrobials investigated                                                                                                                       |
| [85] | Malaysia  | VRE                      | Chicken | Farm     |                         |              | No other antimicrobials investigated                                                                                                                       |
| [87] | Malaysia  | VRE                      | Chicken | Market   | Disk diffusion          | 33           | AMP (27.0%), BAC (82.0%), C (61.0%), CAZ (100%), CLT (100%), CN (97.0%), ERY (100%), KA (100%), NAL (100%), NOR (97.0%), PEN (85.0%), S (100%), TE (91.0%) |
| [86] | Malaysia  | VRE                      | Beef    | Market   | Disk diffusion          | 22           | AMP (41.0%), BAC (100%), C (69.0%), CAZ (100%), CN (100%), ERY (100%), KA (100%), NAL (100%), PEN (41%), S (100%), SXT (95.4%), TE (100%)                  |
| [88] | Thailand  | VRE                      | Pig     | Farm     | Disk diffusion          | 52           | AMP (53.8%), C (34.6%), CIP (32.7%), CN (15.4%), ERY (61.5%), FOM (3.8%), NIT (1.95%), LZ (11.5%), QDP (13.5%), S (11.5%), RIF (9.6%), TE (86.5%),         |
| [90] | Thailand  | MRSA                     | Pig     | Farm     | Disk diffusion          | 5            | CLI (100%), ERY (60.0%), FCX (100%), FOM (0%), PEN (100%), SXT (20.0%), VAN (0%)                                                                           |
| [89] | Thailand  | MRSA                     | Pig     | Farm     | Agar dilution and Etest | 3            | C (100%), CIP (100%), CLI (100%), CN (100%), ERY (66.7%), KA (100%), LZ (0%), STM (0%), SXT (0%), RIF (0%), TE (100%), VAN (0%)                            |

Table S5. Cont.

| Ref.  | Country               | Organism                           | Host                   | Source                         | Method of Testing               | No. Isolates | Prevalence of AMR                                                                                                                                                                    |
|-------|-----------------------|------------------------------------|------------------------|--------------------------------|---------------------------------|--------------|--------------------------------------------------------------------------------------------------------------------------------------------------------------------------------------|
| [93]  | Thailand              | MRSA                               | Pig                    | Farm                           | Disk diffusion                  | 6            | AMC (50.0%), C (50.0%), CLI (100%), CN (50.0%), CRO (33.3%), FOX (76.9%), CZ (33.3%), DOX (33.3%), OTC (100%), PEN (100%), SXT (83.3%), TE (100%)                                    |
| [91]  | Thailand              | MRSA                               | Pig                    | Farm and market                | Broth microdilution             | 11           | C (45.5%), CIP (100%), CN (100%), ERY (36.4%), FFC (45.5%), FOX (100%), PEN (100%), S (18.2%), SMX (27.3%), STM (18.2%), SXT (27.3%), TE (100%), TIA (100%), TMP (100%)              |
| [92]  | Thailand              | MRSA                               | Farmer and Pig         | Farm                           | Disk diffusion<br>Agar dilution | 4            | CN (75.0%), CZ (75.0%), ERY (75.0%), FOX (100%), OF (100%), OXA (100%), TE (100%), VAN (0%)                                                                                          |
| [92]  | Thailand              | MRSA                               | Farmer and Pig         | Farm                           | Disk diffusion<br>Agar dilution | 40           | CN (17.5%), CZ (5.0%), ERY (42.5%), FOX (47.5%), OF (15.9%), OXA (100%), TE (62.5%), VAN (0%)                                                                                        |
| [96]  | Thailand              | <i>Mycoplasma gallisepticum</i>    | Chicken                | Farm                           | Broth microdilution             | 20           | ENR (100%), ERY (100%), LIN (0%), OTC (0%), TIA (0%), TY (0%)                                                                                                                        |
| [97]  | Indonesia             | <i>Haemophilus paragallinarum</i>  | Chicken                | Farm                           | Disk diffusion                  | 14           | AMP (7.1%), DOX (35.7%), ERY (78.6%), NEO (71.4%), OTC (57.1%), S (78.6%), SXT (78.6%)                                                                                               |
| [95]  | Thailand              | <i>Avibacterium paragallinarum</i> | Chicken                | Farm                           | Disk diffusion                  | 18           | AMC (0%), AMP (33.3%), AMX (27.8%), CEF (27.8%), CN (5.6%), DOX (38.9%), ENR (27.8%), ERY (77.8%), LCM (100%), NEO (100%), OTC (55.6%), PEN (27.8%), S (11.1%), SXT (66.7%), TY (0%) |
| [100] | Thailand              | <i>Clostridium perfringens</i>     | Pig                    | Farm                           | Broth microdilution             | 122          | AMP (0.8%), BAC (3.2%), CEF (31.1%), CTC (3.2%), DOX (4.1%), ENR (40.2%), ERY (54.9%), LCM (56.6%), OTC (4.1%), TY (13.1%)                                                           |
| [98]  | Thailand and Malaysia | <i>Burkholderia</i>                | Human, animal and soil | Hospital, animals, environment | Disk diffusion                  | 7            | AMP (85.7%), BAC (100%), C (0%), CN (100%), CLT (100%), CRO (85.7%), ERY (100%), KA (42.9%), NAL (0%), S (100%), TE (0%)                                                             |

Table S5. Cont.

| Ref. | Country  | Organism                  | Host           | Source     | Method of Testing         | No. Isolates | Prevalence of AMR                                             |
|------|----------|---------------------------|----------------|------------|---------------------------|--------------|---------------------------------------------------------------|
| [99] | Malaysia | <i>Burkholderia</i>       | Human, animals | Laboratory | Disk diffusion            | 6            | AMP (100%), KA (100%), CN (100%)                              |
| [94] | Vietnam  | <i>Streptococcus suis</i> | Pig            | Farm       | Disk diffusion and E-test | 45           | C (26.7%), CIP (0%), ERY (51%), PEN (0%), VAN (0%), TE (100%) |

Note: MRSA = methicillin resistant *Staphylococcus aureus*, MRS = methicillin resistant *Staphylococci*, VRE = vancomycin resistant *Enterococci*, NA = not available;  
 Key: AMP = ampicillin, AMC = augmentin, AMX = amoxicillin, BAC = bacitracin, C = chloramphenicol, CLI = clindamycin, CLT = cephalothin, CIP = ciprofloxacin, CTC = chlortetracycline, CN = gentamicin, CZ = cefalozin, CTX = cefotaxime, CRO = ceftriaxone, CEF = ceftiofur, DOX = doxycycline, ENR = enrofloxacin, ERY = erythromycin, FOM = fosfomicin, FOX = cefoxitin, FCX = flucloxacillin, KA = kanamycin, NAL = nalidixic acid, NEO = neomycin, NIT = nitrofurantoin, NOR = norfloxacin, LCM = lincomycin, LZ = linezolid, OTC = oxytetracycline, OF = ofloxacin, OXA = oxacillin, PEN = penicillin, QDP = quinupristinedalfopristin, RIF = rifampin, SMX = sulphamethoxazole, S = streptomycin, STM = spectinomycin, SXT = co-trimoxazole, TIA = tiamulin, TE = tetracycline, TMP = trimethoprim, TY = tylosin, VAN = vancomycin.

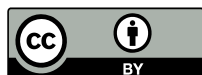

© 2016 by the authors; licensee MDPI, Basel, Switzerland. This article is an open access article distributed under the terms and conditions of the Creative Commons by Attribution (CC-BY) license (<http://creativecommons.org/licenses/by/4.0/>).
